# Supplementary material
Source: HighWire-hosted journal article supplement (https://bmjopen.bmj.com/content/10/5/e036114)
Supplement: inline-supplementary-material-1 [file inline-supplementary-material-1.pdf]

**Data Extraction Form and Quality Assessment Tool**

Canadian Clinical Practice Guidelines for the Use of Cannabinoid-Based Medicine in the Management of Chronic Pain and Co-Occurring Conditions

**Reference**

|  |
|--|
|  |
|--|

**Reviewer Extracting Data**

|  |
|--|
|  |
|--|

**Date form completed**

|  |
|--|
|  |
|--|

**Eligibility form**

| Factors                                                                                                                                             | Assessment          | Comments |
|-----------------------------------------------------------------------------------------------------------------------------------------------------|---------------------|----------|
| <b>Type of Study</b>                                                                                                                                |                     |          |
| 1) Is the study a systematic review or meta-analysis?                                                                                               | Yes    No           |          |
| 2) Is the study a controlled intervention study (randomized, non-randomized or quasi-experimental)?                                                 | Yes    No           |          |
| 3) Is the study an observational cohort or cross-sectional study?                                                                                   | Yes    No           |          |
| 4) Is the study a case-control study?                                                                                                               | Yes    No           |          |
| 5) Is the article a review of system mechanisms, a commentary article or a clinical overview?<br>- identify the type of article in comments section | Yes (exclude)    No |          |

| <b>Participants</b>                                                            |               |              |         |
|--------------------------------------------------------------------------------|---------------|--------------|---------|
| 6) Do participants explicitly present with chronic pain?                       | Yes           | No (exclude) | Unclear |
| 7) Was the pain cancer-related?                                                | Yes (exclude) | No           | Unclear |
| <b>Exclusion Criteria</b>                                                      |               |              |         |
| 8) Did the study measure the effects of non-synthetic CBM use on chronic pain? | Yes           | No (exclude) | Unclear |
| 9) Was cannabis use one aspect of an intervention, but not the main focus?     | Yes (exclude) | No           | Unclear |

*Do not proceed if study excluded from review*

**Systematic Review and Meta-Analysis Data Extraction (Complete only if the answer to question 1 is “yes”)**

| <b>Review Characteristics</b>                                       |        |
|---------------------------------------------------------------------|--------|
| Type(s) of studies included                                         |        |
| # of studies included                                               |        |
| Population studied (HIV+, PTSD, prescribed opioids, etc.)           |        |
| Type(s) of CBM included in review (whole plant, extract, synthetic) |        |
| Main outcome(s)                                                     |        |
| Meta-analyses conducted?                                            | Yes No |
| Key findings                                                        |        |

|             |  |
|-------------|--|
| Conclusions |  |
|-------------|--|

**Systematic Review and Meta-Analysis Quality Assessment (Complete only if the answer to question 1 is “yes”)**

| Criteria                                                                                                                                          |  |
|---------------------------------------------------------------------------------------------------------------------------------------------------|--|
| 1. Is the review based on a focused question that is adequately formulated and described?                                                         |  |
| Yes                                                                                                                                               |  |
| No                                                                                                                                                |  |
| Other (Cannot determine, Not applicable, not reported)                                                                                            |  |
| 2. Were eligibility criteria for included and excluded studies predefined and specified?                                                          |  |
| Yes                                                                                                                                               |  |
| No                                                                                                                                                |  |
| Other (Cannot determine, Not applicable, not reported)                                                                                            |  |
| 3. Did the literature search strategy use a comprehensive systematic approach?                                                                    |  |
| Yes                                                                                                                                               |  |
| No                                                                                                                                                |  |
| Other (Cannot determine, Not applicable, not reported)                                                                                            |  |
| 4. Were titles, abstracts, and full-text articles dually and independently reviewed for inclusion and exclusion to minimize bias?                 |  |
| Yes                                                                                                                                               |  |
| No                                                                                                                                                |  |
| Other (Cannot determine, Not applicable, not reported)                                                                                            |  |
| 5. Was the quality of each included study rated independently by two or more reviewers using a standard method to appraise its internal validity? |  |
| Yes                                                                                                                                               |  |
| No                                                                                                                                                |  |
| Other (Cannot determine, Not applicable, not reported)                                                                                            |  |
| 6. Were the included studies listed along with important characteristics and results of each study?                                               |  |
| Yes                                                                                                                                               |  |
| No                                                                                                                                                |  |
| Other (Cannot determine, Not applicable, not reported)                                                                                            |  |
| 7. Was the publication bias assessed?                                                                                                             |  |
| Yes                                                                                                                                               |  |
| No                                                                                                                                                |  |
| Other (Cannot determine, Not applicable, not reported)                                                                                            |  |
| 8. Was heterogeneity assessed? (This question applies only to meta-analyses)                                                                      |  |
| Yes                                                                                                                                               |  |

|                                                        |  |
|--------------------------------------------------------|--|
| No                                                     |  |
| Other (Cannot determine, Not applicable, not reported) |  |

|                                                  |
|--------------------------------------------------|
| Quality Rating (Good, Fair or Poor)              |
| Rater 1 initials:                                |
| Rater 2 initials:                                |
| Additional comments (if poor, please state why): |

**Controlled Intervention Studies Data Extraction (Complete only if the answer to question 2 is “yes”)**

| Study Characteristics                                                                               |  |
|-----------------------------------------------------------------------------------------------------|--|
| Study year                                                                                          |  |
| Location                                                                                            |  |
| Study design type (i.e., RCT, Quasi-experimental)                                                   |  |
| Study aim (i.e., efficacy, safety, tolerability)                                                    |  |
| Population characteristics (from which study participants are drawn. i.e., HIV+, PTSD, adolescence) |  |
| Sample size:<br>Intervention population sample (#)                                                  |  |
| Control population sample (#)                                                                       |  |
| Sample demographics (and differences between samples)<br>Age<br>Sex<br>Race/Ethnicity               |  |
| Method of recruitment                                                                               |  |
| Length of the intervention                                                                          |  |
| CBM characteristics:<br>- Type<br>- Administration route<br>- Dosing                                |  |
| Type of control (Placebo, alternative, no treatment)                                                |  |

|                        |  |
|------------------------|--|
| Main outcome measures  |  |
| Main findings          |  |
| Comorbidities measured |  |
| Conclusions            |  |

**Controlled Intervention Studies Quality Assessment (Complete only if the answer to question 2 is “yes”)**

|                                                                                                                                                          |  |
|----------------------------------------------------------------------------------------------------------------------------------------------------------|--|
| Criteria                                                                                                                                                 |  |
| 1. Is the study described as randomized, a randomized trial, a randomized clinical trial, or an RCT?                                                     |  |
| Yes                                                                                                                                                      |  |
| No                                                                                                                                                       |  |
| Other (Cannot determine, Not applicable, not reported)                                                                                                   |  |
| 2. Was the method of randomization adequate (ie. Use of a randomly generated assignment)?                                                                |  |
| Yes                                                                                                                                                      |  |
| No                                                                                                                                                       |  |
| Other (Cannot determine, Not applicable, not reported)                                                                                                   |  |
| 3. Was the treatment allocation concealed (so that assignments could not be predicted)?                                                                  |  |
| Yes                                                                                                                                                      |  |
| No                                                                                                                                                       |  |
| Other (Cannot determine, Not applicable, not reported)                                                                                                   |  |
| 4. Were the study participants and providers blinded to treatment group assignment?                                                                      |  |
| Yes                                                                                                                                                      |  |
| No                                                                                                                                                       |  |
| Other (Cannot determine, Not applicable, not reported)                                                                                                   |  |
| 5. Were the people assessing the outcomes blinded to the participants' group assignments?                                                                |  |
| Yes                                                                                                                                                      |  |
| No                                                                                                                                                       |  |
| Other (Cannot determine, Not applicable, not reported)                                                                                                   |  |
| 6. Were the groups similar at baseline on important characteristics that could affect outcomes (e.g., demographics, risk factors, co-morbid conditions)? |  |
| Yes                                                                                                                                                      |  |
| No                                                                                                                                                       |  |
| Other (Cannot determine, Not applicable, not reported)                                                                                                   |  |

|                                                                                                                                                                      |  |
|----------------------------------------------------------------------------------------------------------------------------------------------------------------------|--|
| 7. Was the overall drop-out rate from the study at endpoint 20% or lower of the number allocated to treatment?                                                       |  |
| Yes                                                                                                                                                                  |  |
| No                                                                                                                                                                   |  |
| Other (Cannot determine, Not applicable, not reported)                                                                                                               |  |
| 8. Was the differential drop-out rate (between treatment groups) at endpoint 15 percentage points or lower?                                                          |  |
| Yes                                                                                                                                                                  |  |
| No                                                                                                                                                                   |  |
| Other (Cannot determine, Not applicable, not reported)                                                                                                               |  |
| 9. Was there high adherence to the intervention protocols for each treatment group?                                                                                  |  |
| Yes                                                                                                                                                                  |  |
| No                                                                                                                                                                   |  |
| Other (Cannot determine, Not applicable, not reported)                                                                                                               |  |
| 10. Were other interventions avoided or similar in the groups (e.g., similar background treatments)?                                                                 |  |
| Yes                                                                                                                                                                  |  |
| No                                                                                                                                                                   |  |
| Other (Cannot determine, Not applicable, not reported)                                                                                                               |  |
| 11. Were outcomes assessed using valid and reliable measures, implemented consistently across all study participants?                                                |  |
| Yes                                                                                                                                                                  |  |
| No                                                                                                                                                                   |  |
| Other (Cannot determine, Not applicable, not reported)                                                                                                               |  |
| 12. Did the authors report that the sample size was sufficiently large to be able to detect a difference in the main outcome between groups with at least 80% power? |  |
| Yes                                                                                                                                                                  |  |
| No                                                                                                                                                                   |  |
| Other (Cannot determine, Not applicable, not reported)                                                                                                               |  |
| 13. Were the outcomes reported or subgroups analyzed pre-specified (i.e., identified before analyses were conducted)?                                                |  |
| Yes                                                                                                                                                                  |  |
| No                                                                                                                                                                   |  |
| Other (Cannot determine, Not applicable, not reported)                                                                                                               |  |
| 14. Were all randomized participants analyzed in the group to which they were originally assigned, i.e., did they use an intention-to-treat analysis?                |  |
| Yes                                                                                                                                                                  |  |
| No                                                                                                                                                                   |  |
| Other (Cannot determine, Not applicable, not reported)                                                                                                               |  |

|                                                  |
|--------------------------------------------------|
| Quality Rating (Good, Fair or Poor)              |
| Rater 1 initials:                                |
| Rater 2 initials:                                |
| Additional comments (if poor, please state why): |

**Observational Cohort or Cross-sectional Study Data Extraction (Complete only if the answer to question 3 is “yes”)**

| Study Characteristics                                                 |  |
|-----------------------------------------------------------------------|--|
| Study year                                                            |  |
| Study location                                                        |  |
| Study design type (i.e., prospective, retrospective, cross-sectional) |  |
| Population Characteristics (HIV+, prescribed opioids, etc)            |  |
| Sample Size                                                           |  |
| Sample characteristics<br>Age<br>Sex<br>Race/Ethnicity                |  |
| Method of recruitment                                                 |  |
| Length of study                                                       |  |
| CBM Characteristics                                                   |  |
| Main outcome measures (and any other important outcomes measured)     |  |
| Main Findings/conclusions                                             |  |

**Observational Cohort or Cross-sectional Study Quality Assessment (Complete only if the answer to question 3 is “yes”)**

| Criteria                                                                                                                                                                                                                                    |  |
|---------------------------------------------------------------------------------------------------------------------------------------------------------------------------------------------------------------------------------------------|--|
| 1. Was the research question or objective in this paper clearly stated?                                                                                                                                                                     |  |
| Yes                                                                                                                                                                                                                                         |  |
| No                                                                                                                                                                                                                                          |  |
| Other (Cannot determine, Not applicable, not reported)                                                                                                                                                                                      |  |
| 2. Was the study population clearly specified and defined?                                                                                                                                                                                  |  |
| Yes                                                                                                                                                                                                                                         |  |
| No                                                                                                                                                                                                                                          |  |
| Other (Cannot determine, Not applicable, not reported)                                                                                                                                                                                      |  |
| 3. Was the participation rate of eligible persons at least 50%?                                                                                                                                                                             |  |
| Yes                                                                                                                                                                                                                                         |  |
| No                                                                                                                                                                                                                                          |  |
| Other (Cannot determine, Not applicable, not reported)                                                                                                                                                                                      |  |
| 4. Were all the subjects selected or recruited from the same or similar populations (including the same time period)? Were inclusion and exclusion criteria for being in the study pre-specified and applied uniformly to all participants? |  |
| Yes                                                                                                                                                                                                                                         |  |
| No                                                                                                                                                                                                                                          |  |
| Other (Cannot determine, Not applicable, not reported)                                                                                                                                                                                      |  |
| 5. Was a sample size justification, power description, or variance and effect estimates provided?                                                                                                                                           |  |
| Yes                                                                                                                                                                                                                                         |  |
| No                                                                                                                                                                                                                                          |  |
| Other (Cannot determine, Not applicable, not reported)                                                                                                                                                                                      |  |
| 6. For the analysis of this paper, were the exposure(s) of interest measured prior to the outcome(s) being measured?                                                                                                                        |  |
| Yes                                                                                                                                                                                                                                         |  |
| No                                                                                                                                                                                                                                          |  |
| Other (Cannot determine, Not applicable, not reported)                                                                                                                                                                                      |  |
| 7. Was the timeframe sufficient so that one could reasonably expect to see an association between exposure and outcome if It existed?                                                                                                       |  |
| Yes                                                                                                                                                                                                                                         |  |
| No                                                                                                                                                                                                                                          |  |
| Other (Cannot determine, Not applicable, not reported)                                                                                                                                                                                      |  |
| 8. For exposures that can vary in amount or level, did the study examine different levels of the exposure as related to the outcome (e.g., categories of exposure, or exposure measured as continuous variable)?                            |  |
| Yes                                                                                                                                                                                                                                         |  |
| No                                                                                                                                                                                                                                          |  |
| Other (Cannot determine, Not applicable, not reported)                                                                                                                                                                                      |  |



|                                                                                                                                                           |  |
|-----------------------------------------------------------------------------------------------------------------------------------------------------------|--|
| reported)                                                                                                                                                 |  |
| 9. Were the exposure measures (independent variables) clearly defined, valid, reliable, and implemented consistently across all study participants?       |  |
| Yes                                                                                                                                                       |  |
| No                                                                                                                                                        |  |
| Other (Cannot determine, Not applicable, not reported)                                                                                                    |  |
| 10. Was the exposure(s) assessed more than once over time?                                                                                                |  |
| Yes                                                                                                                                                       |  |
| No                                                                                                                                                        |  |
| Other (Cannot determine, Not applicable, not reported)                                                                                                    |  |
| 11. Were the outcome measures (dependent variables) clearly defined, valid, reliable, and implemented consistently across all study participants?         |  |
| Yes                                                                                                                                                       |  |
| No                                                                                                                                                        |  |
| Other (Cannot determine, Not applicable, not reported)                                                                                                    |  |
| 12. Were the outcome assessors blinded to the exposure status of the participants?                                                                        |  |
| Yes                                                                                                                                                       |  |
| No                                                                                                                                                        |  |
| Other (Cannot determine, Not applicable, not reported)                                                                                                    |  |
| 13. Was loss to follow-up after baseline 20% or less?                                                                                                     |  |
| Yes                                                                                                                                                       |  |
| No                                                                                                                                                        |  |
| Other (Cannot determine, Not applicable, not reported)                                                                                                    |  |
| 14. Were key potential confounding variables measured and adjusted statistically for their impact on the relationship between exposure(s) and outcome(s)? |  |
| Yes                                                                                                                                                       |  |
| No                                                                                                                                                        |  |
| Other (Cannot determine, Not applicable, not reported)                                                                                                    |  |

|                                                  |
|--------------------------------------------------|
| Quality Rating (Good, Fair or Poor)              |
| Rater 1 initials:                                |
| Rater 2 initials:                                |
| Additional comments (if poor, please state why): |

**Case-Control Studies Data Extraction (Complete only if the answer to question 4 is “yes”)**

| Study Characteristics |  |
|-----------------------|--|
| Study year            |  |

|                                                                       |  |
|-----------------------------------------------------------------------|--|
| Study location                                                        |  |
| Study design type (i.e., prospective, retrospective, cross-sectional) |  |
| Population Characteristics (HIV+, prescribed opioids, etc)            |  |
| Sample Size                                                           |  |
| Sample characteristics<br>Age<br>Sex<br>Race/Ethnicity                |  |
| Control Group                                                         |  |
| Method of recruitment                                                 |  |
| Length of study                                                       |  |
| CBM Characteristics                                                   |  |
| Main outcome measures (and any other important outcomes measured)     |  |
| Main Findings/conclusions                                             |  |

**Case-Control Studies Quality Assessment (Complete only if the answer to question 4 is “yes”)**

|                                                                                         |  |
|-----------------------------------------------------------------------------------------|--|
| Criteria                                                                                |  |
| 1. Was the research question or objective in this paper clearly stated and appropriate? |  |
| Yes                                                                                     |  |
| No                                                                                      |  |
| Other (Cannot determine, Not applicable, not reported)                                  |  |
| 2. Was the study population clearly specified and defined?                              |  |
| Yes                                                                                     |  |
| No                                                                                      |  |
| Other (Cannot determine, Not applicable, not reported)                                  |  |

|                                                                                                                                                                                                               |  |
|---------------------------------------------------------------------------------------------------------------------------------------------------------------------------------------------------------------|--|
| reported)                                                                                                                                                                                                     |  |
| 3. Did the authors include a sample size justification?                                                                                                                                                       |  |
| Yes                                                                                                                                                                                                           |  |
| No                                                                                                                                                                                                            |  |
| Other (Cannot determine, Not applicable, not reported)                                                                                                                                                        |  |
| 4. Were controls selected or recruited from the same or similar population that gave rise to the cases (including the same timeframe)?                                                                        |  |
| Yes                                                                                                                                                                                                           |  |
| No                                                                                                                                                                                                            |  |
| Other (Cannot determine, Not applicable, not reported)                                                                                                                                                        |  |
| 5. Were the definitions, inclusion and exclusion criteria, algorithms or processes used to identify or select cases and controls valid, reliable, and implemented consistently across all study participants? |  |
| Yes                                                                                                                                                                                                           |  |
| No                                                                                                                                                                                                            |  |
| Other (Cannot determine, Not applicable, not reported)                                                                                                                                                        |  |
| 6. Were the cases clearly defined and differentiated from controls?                                                                                                                                           |  |
| Yes                                                                                                                                                                                                           |  |
| No                                                                                                                                                                                                            |  |
| Other (Cannot determine, Not applicable, not reported)                                                                                                                                                        |  |
| 7. If less than 100 percent of eligible cases and/or controls were selected for the study, were the cases and/or controls randomly selected from those eligible?                                              |  |
| Yes                                                                                                                                                                                                           |  |
| No                                                                                                                                                                                                            |  |
| Other (Cannot determine, Not applicable, not reported)                                                                                                                                                        |  |
| 8. Was there use of concurrent controls?                                                                                                                                                                      |  |
| Yes                                                                                                                                                                                                           |  |
| No                                                                                                                                                                                                            |  |
| Other (Cannot determine, Not applicable, not reported)                                                                                                                                                        |  |
| 9. Were the investigators able to confirm that the exposure/risk occurred prior to the development of the condition or event that defined a participant as a case?                                            |  |
| Yes                                                                                                                                                                                                           |  |
| No                                                                                                                                                                                                            |  |
| Other (Cannot determine, Not applicable, not reported)                                                                                                                                                        |  |
| 10. Were the measures of exposure/risk clearly defined, valid, reliable, and implemented consistently (including the same time period) across all study participants?                                         |  |
| Yes                                                                                                                                                                                                           |  |
| No                                                                                                                                                                                                            |  |
| Other (Cannot determine, Not applicable, not reported)                                                                                                                                                        |  |
| 11. Were the assessors of exposure/risk blinded to the case or control status of participants?                                                                                                                |  |

|                                                                                                                                                                                           |  |
|-------------------------------------------------------------------------------------------------------------------------------------------------------------------------------------------|--|
| Yes                                                                                                                                                                                       |  |
| No                                                                                                                                                                                        |  |
| Other (Cannot determine, Not applicable, not reported)                                                                                                                                    |  |
| 12. Were key potential confounding variables measured and adjusted statistically in the analyses? If matching was used, did the investigators account for matching during study analysis? |  |
| Yes                                                                                                                                                                                       |  |
| No                                                                                                                                                                                        |  |
| Other (Cannot determine, Not applicable, not reported)                                                                                                                                    |  |

|                                                  |
|--------------------------------------------------|
| Quality Rating (Good, Fair or Poor)              |
| Rater 1 initials:                                |
| Rater 2 initials:                                |
| Additional comments (if poor, please state why): |
